# Supplementary material
Source: publisher figshare collection journal article supplement (https://tandf.figshare.com/ndownloader/files/12765230)
Supplement: Supplementary file 1 [file 12765230]

**Nomenclature**

Symbols

| △E | Color difference |
| --- | --- |
| L* | Lightness in CIE-Lab color space |
| a* | Red (+ values) or green (- values) color in CIE-Lab color space |
| b* | Yellow (+ values) or blue (- values) color in CIE-Lab color space |
| R | Red color in RGB color space |
| G | Green color RGB color space |
| B | Blue color RGB color space |
| R2 | Coefficient of determination in regression analysis |
| Csrgb | One from Rsrgb, Gsrgb, and Bsrgb |
| Clinear | One from Rlinear, Glinear, and Blinear |
| Rsrgb | Red color in standard RGB color space |
| Gsrgb | Green color in standard RGB color space |
| Bsrgb | Blue color in standard RGB color space |
| Rlinear | Linear R value |
| Glinear | Linear G value |
| Blinear | Linear B value |
| X | Stimulus value X in CIE-XYZ color space |
| Y | Stimulus value Y in CIE-XYZ color space |
| Z | Stimulus value Z in CIE-XYZ color space |
| Xn | Stimulus value X of the reference white point in CIE-XYZ color space |
| Yn | Stimulus value Y of the reference white point in CIE-XYZ color space |
| Zn | Stimulus value Z of the reference white point in CIE-XYZ color space |

**Abbreviations**

| HPLC | High-Performance Liquid Chromatography |
| --- | --- |
| CIE | International Commission on Illumination |
| CIE-Lab | CIE color space with dimensions L for lightness and a and b for the color-opponent dimensions |
| CIE-XYZ | CIE color space with dimensions of X, Y and Z for the tristimulus values |
| SDK | Software Development Kit |
| JDK | Java Development Kit |
| API | Application Programming Interface |
| RGB | Red, Green and Blue color space |
| sRGB | standard RGB color space |
| JA ZEN-NOH | Japan National Federation of Agricultural Cooperative Associations |
